# Supplementary material
Source: MDPI journal article supplement (https://www.mdpi.com/2571-8797/4/3/42)
Supplement: s1 [file s1]

# Iron and magnesium impregnation of avocado seed biochar for aqueous phosphate removal

James Jihoon Kang <sup>1\*</sup>, Jason Parsons <sup>2</sup>, Sampath Gunukula <sup>3</sup>, Dat T. Tran <sup>4</sup>

## Supplementary Materials

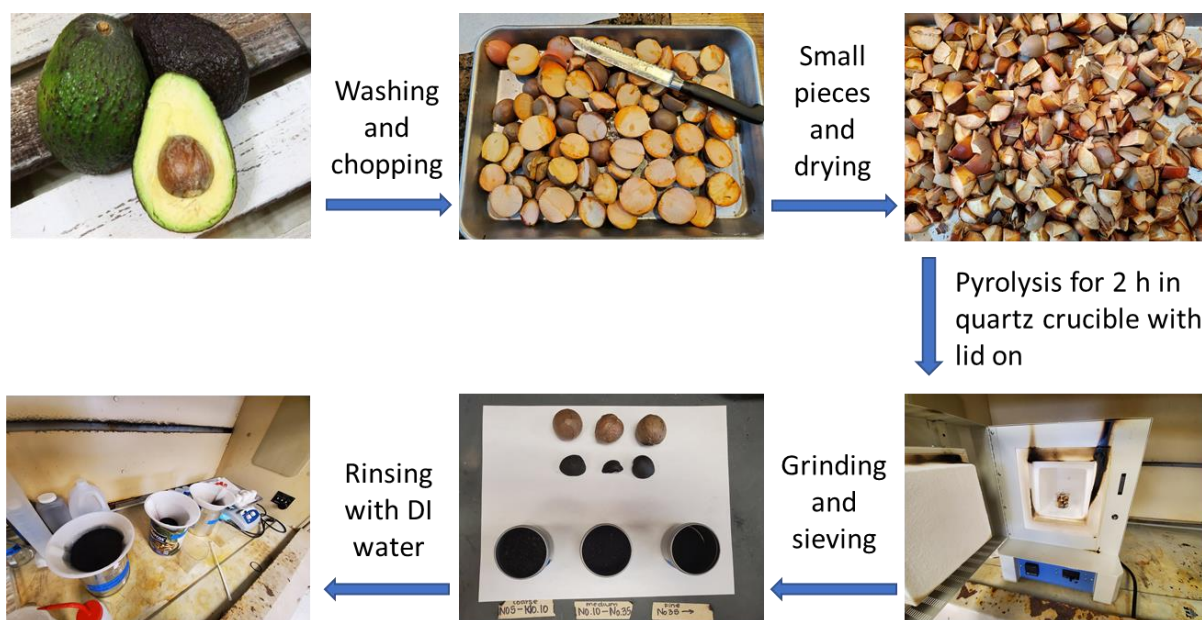

Figure S1: Avocado seed biochar (AB) preparation.

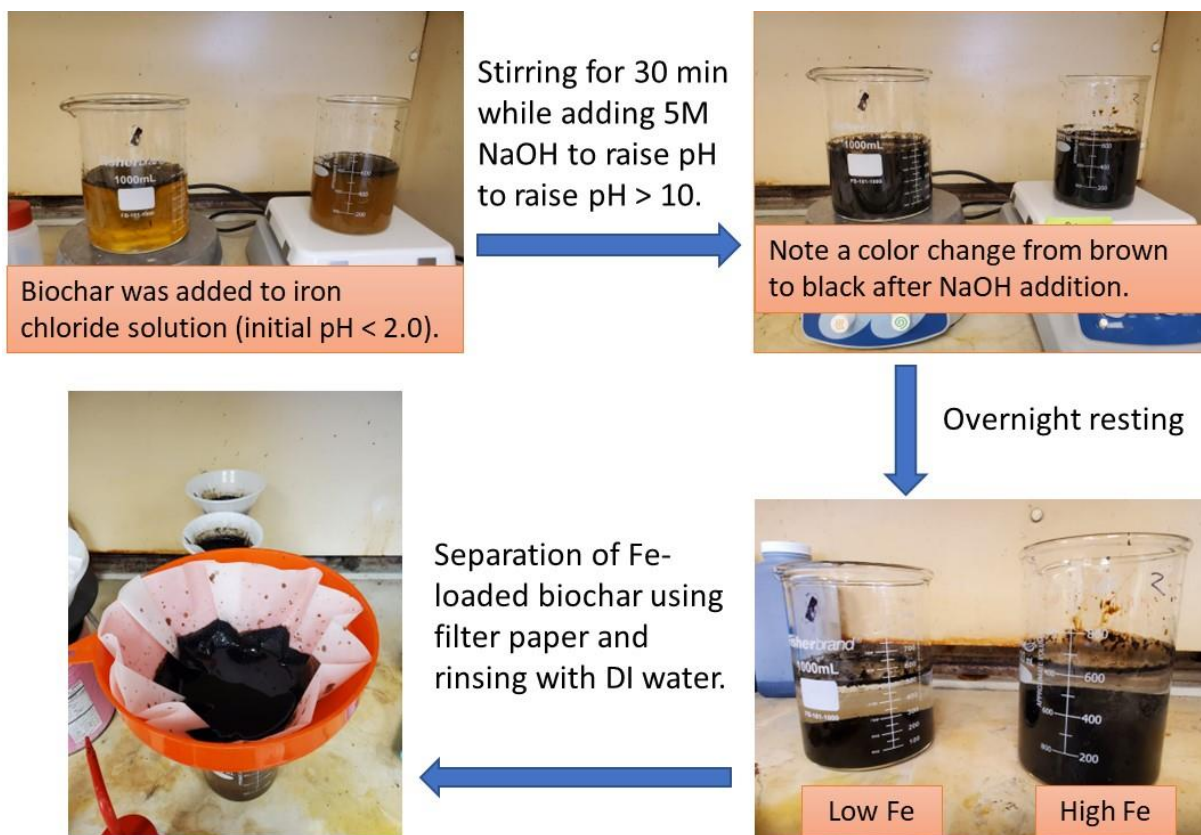

Figure S2: Preparation of Fe-loaded avocado seed biochar.

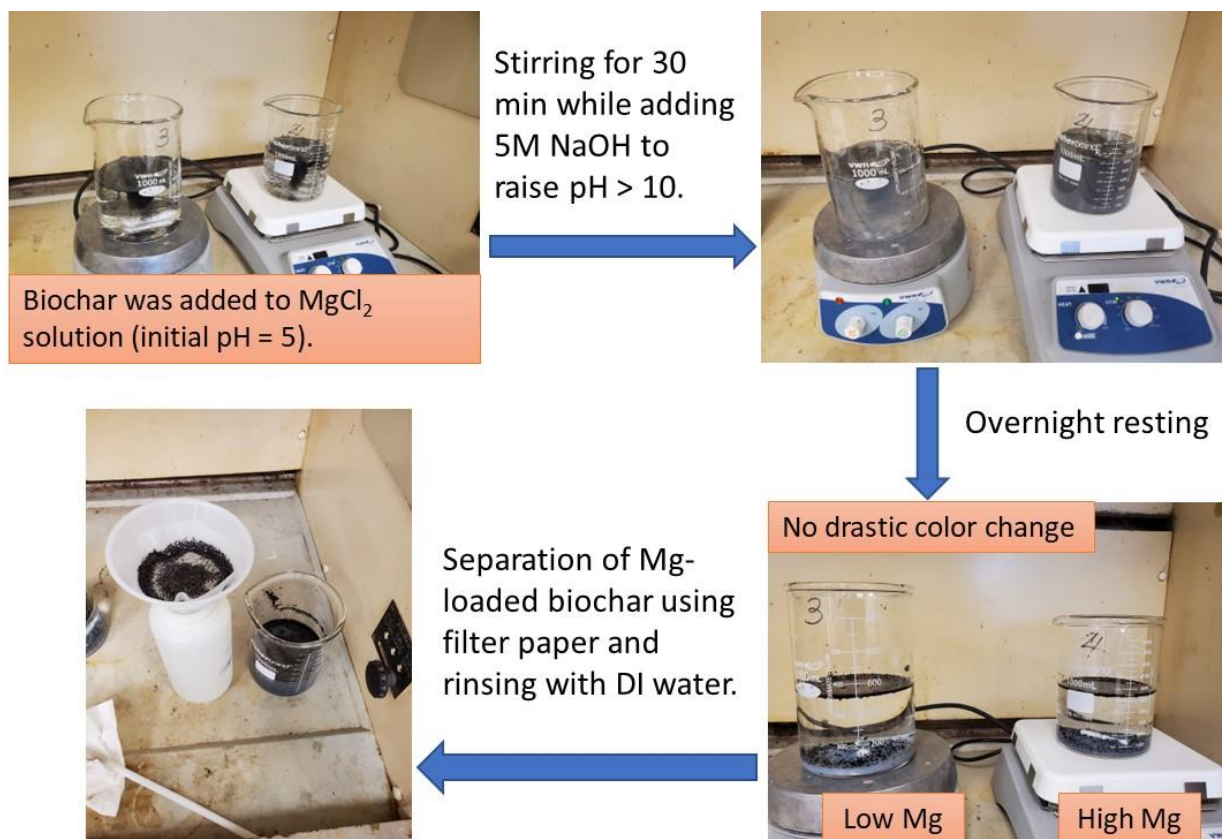

Figure S3: Preparation of Mg-loaded avocado seed biochar.
